# Supplementary material
Source: PubMed Central journal article supplement (PMC9649429)
Supplement: ciac537_supplementary_data.pdf [file ciac537_supplementary_data.pdf]

**Supplement to *Risk Factors for Severe Cutaneous Anthrax in a Retrospective Case Series and Use of a Clinical Algorithm to Identify Likely Meningitis and Evaluate Treatment Outcomes, Kyrgyz Republic, 2005-2012***

Kutmanova A et al.

Published in *Clinical Infectious Diseases*

## Table of Contents

|                               |                                                                                                                                                                                                                                           |    |
|-------------------------------|-------------------------------------------------------------------------------------------------------------------------------------------------------------------------------------------------------------------------------------------|----|
| <b>Supplementary Text.</b>    | Methods for Antimicrobial Susceptibility Testing.....                                                                                                                                                                                     | 3  |
| <b>Supplementary Table 1.</b> | Sensitivity, Specificity, and Likelihood Ratios of Clinical Algorithms for the Identification of Meningitis in Adults with Systemic Cutaneous Anthrax Based on a Dataset from the English-Language Literature, 1880-2018 ....             | 4  |
| <b>Supplementary Table 2.</b> | Antimicrobial Resistance Testing by Severity and Meningitis Status Among Cutaneous Anthrax Patients with a Positive Culture, Kyrgyz Republic, 2005-2012 .....                                                                             | 6  |
| <b>Supplementary Table 3.</b> | Antimicrobial Use in the Year Prior to Current Illness Hospitalization by Antimicrobial and Illness Type Among 230 Cutaneous Anthrax Patients, Kyrgyz Republic, 2005-2012.....                                                            | 8  |
| <b>Supplementary Table 4.</b> | Unadjusted and Age-Adjusted Odds Ratios for Patient Chronic Conditions and Social Histories by Likely Meningitis Status Among Cutaneous Anthrax Patients, Kyrgyz Republic, 2005-2012.....                                                 | 9  |
| <b>Supplementary Table 5.</b> | Sensitivity Analysis of Patient Demographics, Presenting Signs and Symptoms, Laboratory Results and Treatments Using an Alternative Classification of Meningitis Status Among Cutaneous Anthrax Patients, Kyrgyz Republic, 2005-2012..... | 10 |

## Supplementary Text. Methods for Antimicrobial Susceptibility Testing

Antimicrobial susceptibility testing is routinely performed on cultures positive for *Bacillus anthracis* from patients in Kyrgyz hospitals. The sensitivity of the pathogen to antimicrobial drugs was determined by the agar-based disk diffusion method using colonies typically from 16-18 hours agar cultures. A suspension of microbes was prepared from the grown colonies in a 0.9% sodium chloride solution. This suspension in a volume of 0.3 ml was then applied to the surface of the Mueller-Hinton or AGV nutrient medium and spread evenly with a spatula. Cups were incubated for 15 minutes at room temperature to absorb the liquid. The disks were placed with tweezers on the surface of the seeded nutrient medium equally distanced from one another, retreating about 2 cm from the wall of the dish (no more than 4 disks). They were kept for 15 minutes at room temperature, and then, were turned upside down and incubated at  $(36 \pm 1)$  °C for 18-20 hours. The diameter of the zones of growth inhibition around the discs was measured, including the diameter of the disc itself, to the nearest 1 mm. Small colonies within the growth retardation zone were not counted. For blurry zone edges or for zones with double contours, the zone diameter was measured along the most distinct boundary.

**Supplementary Table 1. Sensitivity, Specificity, and Likelihood Ratios of Clinical Algorithms for the Identification of Meningitis in Adults with Systemic Cutaneous Anthrax Based on a Dataset from the English-Language Literature, 1880-2018**

|                                                                                         | TP | FN | FP | TN  | Sensitivity<br>(%, 95% CI) | Specificity<br>(%, 95% CI) | LR+ (95% CI)                       | LR- (95% CI)    | Proportion<br>of<br>Unclassified<br>Cases |
|-----------------------------------------------------------------------------------------|----|----|----|-----|----------------------------|----------------------------|------------------------------------|-----------------|-------------------------------------------|
| Derivation Sample <sup>a</sup>                                                          |    |    |    |     |                            |                            |                                    |                 |                                           |
| 1. Altered mental status                                                                | 29 | 10 | 5  | 123 | 74 (61-88)                 | 96 (93-99)                 | 19.04 (7.91-45.84)                 | 0.27 (.16-.46)  | 0%                                        |
| 2a. At least two of the following: FV/38, N/V, SHA, ABP, AMS, MPE, RR <sub>≥</sub> 30   | 33 | 6  | 16 | 82  | 85 (73-96)                 | 84 (76-91)                 | 5.18 (3.25-8.27)                   | 0.18 (.09-.39)  | 17%                                       |
| 2b. At least three of the following: FV/38, N/V, SHA, ABP, AMS, MPE, RR <sub>≥</sub> 30 | 17 | 16 | 4  | 92  | 52 (34-69)                 | 96 (92-100)                | 12.36 (4.48-34.11)                 | 0.51 (.36-.72)  |                                           |
| 3a. At least two of the following: FV/38, N/V, SHA, AMS, MPE                            | 33 | 6  | 14 | 113 | 85 (73-96)                 | 89 (84-94)                 | 7.68 (4.60-12.81)                  | 0.17 (.08-.36)  | 18%                                       |
| 3b. At least three of the following: FV/38, N/V, SHA, AMS, MPE                          | 14 | 25 | 3  | 125 | 36 (21-51)                 | 98 (95-100)                | 15.32 (4.64-50.56)                 | 0.66 (.52-.83)  |                                           |
| 4a. At least two of the following: FV/38, N/V, SHA, AMS, MPE, RR <sub>≥</sub> 30        | 33 | 6  | 16 | 82  | 85 (73-96)                 | 84 (76-91)                 | 5.18 (3.25-8.27)                   | 0.18 (.09-.39)  | 18%                                       |
| 4b. At least three of the following: FV/38, N/V, SHA, AMS, MPE, RR <sub>≥</sub> 30      | 16 | 17 | 3  | 93  | 48 (31-66)                 | 97 (93-100)                | 15.52 (4.83-49.89)                 | 0.53 (.38-.74)  |                                           |
| 5a. At least one of the following: N/V, SHA, AMS, MPE                                   | 37 | 2  | 26 | 102 | 95 (88-100)                | 80 (73-87)                 | 4.67 (3.29-6.63)                   | 0.06 (.02-.25)  | 24%                                       |
| 5b. At least two of the following: N/V, SHA, AMS, MPE                                   | 20 | 19 | 3  | 125 | 51 (36-67)                 | 98 (95-100)                | 21.88 (6.86-69.75)                 | 0.50 (.36-.69)  |                                           |
| 6a. At least one of the following: SHA, AMS, MPE                                        | 37 | 2  | 21 | 107 | 95 (88-100)                | 84 (77-90)                 | 5.78 (3.88-8.61)                   | 0.06 (.02-.24)  | 25%                                       |
| 6b. At least two of the following: SHA, AMS, MPE                                        | 14 | 25 | 3  | 125 | 36 (21-51)                 | 98 (95-100)                | 15.32 (4.64-50.56)                 | 0.66 (.52-.83)  |                                           |
| 7a. At least one of the following: N/V, AMS, MPE                                        | 35 | 4  | 26 | 102 | 90 (80-99)                 | 80 (73-87)                 | 4.42 (3.09-6.33)                   | 0.13 (.05-.33)  | 26%                                       |
| 7b. At least two of the following: N/V, AMS, MPE                                        | 17 | 22 | 0  | 128 | 44 (28-59)                 | 100 (100-100)              | 112.88 (6.94-1835.35) <sup>b</sup> | 0.56 (.43-.74)  |                                           |
| Validation sample <sup>a</sup>                                                          |    |    |    |     |                            |                            |                                    |                 |                                           |
| 3a. At least two of the following: FV/38, N/V, SHA, AMS, MPE                            | 9  | 4  | 5  | 23  | 69 (44-94)                 | 82 (68-96)                 | 3.88 (1.62-9.28)                   | 0.37 (.16-.86)  | 20%                                       |
| 3b. At least three of the following: FV/38, N/V, SHA, AMS, MPE                          | 4  | 9  | 2  | 26  | 31 (6-56)                  | 93 (83-100)                | 4.31 (0.90-20.60)                  | 0.75 (.51-1.09) |                                           |
| Sensitivity analysis <sup>a</sup>                                                       |    |    |    |     |                            |                            |                                    |                 |                                           |
| 3a. At least two of the following: FV/38, N/V, SHA, AMS, MPE                            | 20 | 9  | 18 | 119 | 69 (52-86)                 | 87 (81-93)                 | 5.25 (3.20-8.61)                   | 0.36 (.21-.62)  | 14%                                       |
| 3b. At least three of the following: FV/38, N/V, SHA, AMS, MPE                          | 10 | 19 | 5  | 133 | 34 (17-52)                 | 96 (93-99)                 | 9.52 (3.51-25.77)                  | 0.68 (.52-.89)  |                                           |

---

Abbreviations: ABP, abdominal pain; AMS, altered mental status; CI, confidence interval; FN, false negative; FP, false positive; FV/38, fever (symptom) or documented temperature >38°C (adults) >38.5°C (children); LR, likelihood ratio; MPE, malignant pustule edema; N/V, nausea or vomiting; RR, respiratory rate; SHA, severe headache; TN, true negative; TP, true positive.

<sup>a</sup>All analyses exclude suspected meningitis cases. Derivation sample based on an 80% random sample of adults (aged ≥18 years) with systemic cutaneous anthrax, validation sample is the remaining 20% of adults with systemic cutaneous anthrax. Sensitivity analysis was based on the full adult systemic cutaneous anthrax dataset excluding those that died on day 1 of hospitalization.

<sup>b</sup>Continuity correction factor of 0.5 added to TP, FN, FP, and TN.

---

**Supplementary Table 2. Antimicrobial Resistance Testing by Severity and Meningitis Status Among Cutaneous Anthrax Patients with a Positive Culture, Kyrgyz Republic, 2005-2012**

| Characteristics        | Overall<br>(N=124)<br>n (%) | Mild<br>(N=90)<br>n (%) | Moderate<br>(N=23)<br>n (%) | Severe<br>(N=11)<br>n (%) | Likely<br>Nonmeningitis <sup>a</sup><br>(N=39)<br>n (%) | Likely<br>Meningitis <sup>a</sup><br>(N=22)<br>n (%) |
|------------------------|-----------------------------|-------------------------|-----------------------------|---------------------------|---------------------------------------------------------|------------------------------------------------------|
| <b>Amoxicillin</b>     |                             |                         |                             |                           |                                                         |                                                      |
| Resistant              | 0 (0)                       | 0 (0)                   | 0 (0)                       | 0 (0)                     | 0 (0)                                                   | 0 (0)                                                |
| Intermediate           | 9 (7.3)                     | 7 (7.8)                 | 1 (4.4)                     | 1 (9.1)                   | 3 (7.7)                                                 | 2 (9.1)                                              |
| Susceptible            | 115 (92.7)                  | 83 (92.2)               | 22 (95.7)                   | 10 (90.9)                 | 36 (92.3)                                               | 20 (90.9)                                            |
| <b>Ampicillin</b>      |                             |                         |                             |                           |                                                         |                                                      |
| Resistant              | 69 (55.7)                   | 57 (63.3)               | 8 (34.8)                    | 4 (36.4)                  | 27 (69.2)                                               | 9 (40.9)                                             |
| Intermediate           | 25 (20.2)                   | 11 (12.2)               | 11 (47.8)                   | 3 (27.3)                  | 4 (10.3)                                                | 5 (22.7)                                             |
| Susceptible            | 30 (24.2)                   | 22 (24.4)               | 4 (17.4)                    | 4 (36.4)                  | 8 (20.5)                                                | 8 (36.4)                                             |
| <b>Cefalexin</b>       |                             |                         |                             |                           |                                                         |                                                      |
| Resistant              | 2 (1.6)                     | 2 (2.2)                 | 0 (0)                       | 0 (0)                     | 0 (0)                                                   | 0 (0)                                                |
| Intermediate           | 6 (4.8)                     | 5 (5.6)                 | 0 (0)                       | 1 (9.1)                   | 2 (5.1)                                                 | 1 (4.5)                                              |
| Susceptible            | 116 (93.6)                  | 83 (92.2)               | 23 (100)                    | 10 (90.9)                 | 37 (94.9)                                               | 21 (95.5)                                            |
| <b>Chloramphenicol</b> |                             |                         |                             |                           |                                                         |                                                      |
| Resistant              | 24 (19.4)                   | 16 (17.8)               | 6 (26.1)                    | 2 (18.2)                  | 6 (15.4)                                                | 7 (31.8)                                             |
| Intermediate           | 22 (17.8)                   | 13 (14.4)               | 7 (30.4)                    | 2 (18.2)                  | 3 (7.7)                                                 | 7 (31.8)                                             |
| Susceptible            | 78 (62.9)                   | 61 (67.8)               | 10 (43.5)                   | 7 (63.6)                  | 30 (76.9)                                               | 8 (36.4)                                             |
| <b>Ciprofloxacin</b>   |                             |                         |                             |                           |                                                         |                                                      |
| Resistant              | 2 (1.6)                     | 2 (2.2)                 | 0 (0)                       | 0 (0)                     | 1 (2.6)                                                 | 0 (0)                                                |
| Intermediate           | 7 (5.7)                     | 6 (6.7)                 | 1 (4.4)                     | 0 (0)                     | 2 (5.1)                                                 | 1 (4.5)                                              |
| Susceptible            | 115 (92.7)                  | 82 (91.1)               | 22 (95.7)                   | 11 (100)                  | 36 (92.3)                                               | 21 (95.5)                                            |
| <b>Doxycycline</b>     |                             |                         |                             |                           |                                                         |                                                      |
| Resistant              | 4 (3.2)                     | 4 (4.4)                 | 0 (0)                       | 0 (0)                     | 2 (5.1)                                                 | 0 (0)                                                |
| Intermediate           | 10 (8.1)                    | 7 (7.8)                 | 2 (8.7)                     | 1 (9.1)                   | 2 (5.1)                                                 | 1 (4.5)                                              |
| Susceptible            | 110 (88.7)                  | 79 (87.8)               | 21 (91.3)                   | 10 (90.9)                 | 35 (89.7)                                               | 21 (95.5)                                            |
| <b>Gentamicin</b>      |                             |                         |                             |                           |                                                         |                                                      |
| Resistant              | 26 (21.0)                   | 14 (15.6)               | 8 (34.8)                    | 4 (36.4)                  | 7 (18.0)                                                | 5 (22.7)                                             |
| Intermediate           | 37 (30.0)                   | 27 (30.0)               | 8 (34.8)                    | 2 (18.2)                  | 5 (12.8)                                                | 10 (45.5)                                            |
| Susceptible            | 61 (49.2)                   | 49 (54.4)               | 7 (30.4)                    | 5 (45.5)                  | 27 (69.2)                                               | 7 (31.8)                                             |
| <b>Ofloxacin</b>       |                             |                         |                             |                           |                                                         |                                                      |
| Resistant              | 1 (0.8)                     | 1 (1.1)                 | 0 (0)                       | 0 (0)                     | 1 (2.6)                                                 | 0 (0)                                                |
| Intermediate           | 11 (8.9)                    | 2 (2.2)                 | 6 (26.1)                    | 3 (27.3)                  | 0 (0)                                                   | 4 (18.2)                                             |
| Susceptible            | 112 (90.3)                  | 87 (96.7)               | 17 (73.9)                   | 8 (72.7)                  | 38 (97.4)                                               | 18 (81.8)                                            |
| <b>Penicillin</b>      |                             |                         |                             |                           |                                                         |                                                      |
| Resistant              | 14 (11.3)                   | 10 (11.1)               | 3 (13.0)                    | 1 (9.1)                   | 5 (12.8)                                                | 3 (13.6)                                             |
| Intermediate           | 6 (4.8)                     | 4 (4.4)                 | 2 (8.7)                     | 0 (0)                     | 4 (10.3)                                                | 0 (0)                                                |
| Susceptible            | 104 (83.9)                  | 76 (84.4)               | 18 (78.3)                   | 10 (90.9)                 | 30 (76.9)                                               | 19 (86.4)                                            |
| <b>Rifampicin</b>      |                             |                         |                             |                           |                                                         |                                                      |
| Resistant              | 1 (0.8)                     | 1 (1.1)                 | 0 (0)                       | 0 (0)                     | 1 (2.6)                                                 | 0 (0)                                                |
| Intermediate           | 10 (8.1)                    | 10 (11.1)               | 0 (0)                       | 0 (0)                     | 2 (5.1)                                                 | 2 (9.1)                                              |
| Susceptible            | 113 (91.1)                  | 79 (87.8)               | 23 (100)                    | 11 (100)                  | 36 (92.3)                                               | 20 (90.9)                                            |
| <b>Streptomycin</b>    |                             |                         |                             |                           |                                                         |                                                      |
| Resistant              | 16 (12.9)                   | 13 (14.4)               | 3 (13.0)                    | 0 (0)                     | 4 (10.3)                                                | 2 (9.1)                                              |
| Intermediate           | 35 (28.2)                   | 12 (13.3)               | 16 (69.6)                   | 7 (63.6)                  | 4 (10.3)                                                | 10 (45.5)                                            |
| Susceptible            | 73 (58.9)                   | 65 (72.2)               | 4 (17.4)                    | 4 (36.4)                  | 31 (79.5)                                               | 10 (45.5)                                            |

| Characteristics                    | Overall<br>(N=124)<br>n (%) | Mild<br>(N=90)<br>n (%) | Moderate<br>(N=23)<br>n (%) | Severe<br>(N=11)<br>n (%) | Likely<br>Nonmeningitis <sup>a</sup><br>(N=39)<br>n (%) | Likely<br>Meningitis <sup>a</sup><br>(N=22)<br>n (%) |
|------------------------------------|-----------------------------|-------------------------|-----------------------------|---------------------------|---------------------------------------------------------|------------------------------------------------------|
| Trimethoprim /<br>Sulfamethoxazole |                             |                         |                             |                           |                                                         |                                                      |
| Resistant                          | 32 (25.8)                   | 20 (22.2)               | 8 (34.8)                    | 4 (36.4)                  | 11 (28.2)                                               | 6 (27.3)                                             |
| Intermediate                       | 54 (43.6)                   | 43 (47.8)               | 10 (43.5)                   | 1 (9.1)                   | 14 (35.9)                                               | 9 (40.9)                                             |
| Susceptible                        | 38 (30.7)                   | 27 (30.0)               | 5 (21.7)                    | 6 (54.6)                  | 14 (35.9)                                               | 7 (31.8)                                             |

<sup>a</sup> The designations “likely nonmeningitis” and “likely meningitis” were applied based on a clinical algorithm that categorized patients based on signs and symptoms. Patients meeting  $\geq 3$  criteria were designated as “likely meningitis” while patients meeting  $\leq 1$  were designated “likely nonmeningitis.”

**Supplementary Table 3. Antimicrobial Use in the Year Prior to Current Illness Hospitalization by Antimicrobial and Illness Type Among 230 Cutaneous Anthrax Patients, Kyrgyz Republic, 2005-2012**

| Illness Type          | Ampicillin<br>n (%) | Chloramphenicol<br>n (%) | Gentamicin<br>n (%) | Co-trimoxazole<br>n (%) |
|-----------------------|---------------------|--------------------------|---------------------|-------------------------|
| Infected skin wound   | 52 (22.6)           | 67 (29.1)                | 43 (18.7)           | 18 (7.8)                |
| Erysipelas            | 29 (12.6)           | 26 (11.3)                | 19 (8.3)            | 13 (5.7)                |
| Fever, unknown origin | 35 (15.2)           | 71 (30.9)                | 81 (35.2)           | 57 (24.8)               |
| Sore throat           | 68 (29.6)           | 36 (15.7)                | 46 (20.0)           | 56 (24.3)               |
| Cough                 | 46 (20.0)           | 25 (10.9)                | 36 (15.7)           | 62 (27.0)               |
| Overall               | 230 (100.0)         | 225 (97.8)               | 225 (97.8)          | 206 (89.6)              |



**Supplementary Table 4. Unadjusted and Age-Adjusted Odds Ratios for Patient Chronic Conditions and Social Histories by Likely Meningitis Status Among Cutaneous Anthrax Patients, Kyrgyz Republic, 2005-2012**

| Characteristics                 | Likely Nonmeningitis <sup>a</sup><br>(N=89)<br>n (%) | Likely Meningitis <sup>a</sup><br>(N=37)<br>n (%) | Unadjusted<br>Odds Ratio<br>(95% CI) | Age-Adjusted<br>Odds Ratio<br>(95% CI) |
|---------------------------------|------------------------------------------------------|---------------------------------------------------|--------------------------------------|----------------------------------------|
| <b>Chronic conditions</b>       |                                                      |                                                   |                                      |                                        |
| Number of chronic conditions    |                                                      |                                                   |                                      |                                        |
| 0                               | 68 (76.4)                                            | 9 (24.3)                                          | Reference                            | Reference                              |
| 1                               | 15 (16.9)                                            | 12 (32.4)                                         | 6.0 (2.2, 16.9)                      | 6.1 (2.2, 17.3)                        |
| 2                               | 5 (5.6)                                              | 6 (16.2)                                          | 9.1 (2.3, 35.9)                      | 9.8 (2.4, 40.9)                        |
| 3                               | 1 (1.1)                                              | 10 (27.0)                                         | 75.6 (8.6, 661.7)                    | 91.2 (8.8, 947.8)                      |
| <b>Social history</b>           |                                                      |                                                   |                                      |                                        |
| Smoker (male) <sup>b</sup>      |                                                      |                                                   |                                      |                                        |
| Never                           | 42 (53.8)                                            | 5 (15.6)                                          | Reference                            | Reference                              |
| Former                          | 2 (2.6)                                              | 7 (21.9)                                          | 29.4 (4.7, 182.3)                    | 27.0 (4.0, 180.4)                      |
| Current                         | 34 (43.6)                                            | 19 (59.4)                                         | 4.7 (1.6, 13.9)                      | 4.7 (1.6, 14.0)                        |
| Alcohol use (male) <sup>b</sup> |                                                      |                                                   |                                      |                                        |
| Never                           | 55 (70.5)                                            | 18 (56.3)                                         | Reference                            | Reference                              |
| Former                          | 9 (11.5)                                             | 11 (34.4)                                         | 3.7 (1.3, 10.5)                      | 3.3 (1.1, 10.1)                        |
| Current                         | 14 (17.9)                                            | 3 (9.4)                                           | 0.7 (.2, 2.5)                        | 0.6 (.2, 2.5)                          |

<sup>a</sup> The designations “likely nonmeningitis” and “likely meningitis” were applied based on a clinical algorithm that categorized patients based on signs and symptoms. Patients meeting  $\geq 3$  criteria were designated as “likely meningitis” while patients meeting  $\leq 1$  were designated “likely nonmeningitis.”

<sup>b</sup> All female patients reported being never smokers and never drinking alcohol, except 1 who reported being a current smoker and 1 who reported being a former drinker.

**Supplementary Table 5. Sensitivity Analysis of Patient Demographics, Presenting Signs and Symptoms, Laboratory Results and Treatments Using an Alternative Classification of Meningitis Status Among Cutaneous Anthrax Patients, Kyrgyz Republic, 2005-2012**

| Characteristics                     | Likely<br>Nonmeningitis <sup>a</sup><br>(n=153)<br>n (%) | Likely<br>Meningitis <sup>a</sup><br>(n=8)<br>n (%) | Odds Ratio (95% CI) | P Value |
|-------------------------------------|----------------------------------------------------------|-----------------------------------------------------|---------------------|---------|
| <b>Demographics</b>                 |                                                          |                                                     |                     |         |
| Age (years)                         |                                                          |                                                     |                     |         |
| < 18                                | 2 (1.3)                                                  | 0 (0)                                               | ...                 | ...     |
| 18-49                               | 130 (85.0)                                               | 6 (75.0)                                            | Reference           | ...     |
| ≥ 50                                | 21 (13.7)                                                | 2 (25.0)                                            | 2.11 (.2, 12.5)     | .7      |
| Male                                | 137 (89.5)                                               | 6 (75.0)                                            | 0.4 (0.06, 1.9)     | .2      |
| <b>Chronic conditions</b>           |                                                          |                                                     |                     |         |
| Obesity                             | 24 (15.7)                                                | 5 (62.5)                                            | 9.0 (2.0, 40.0)     | .004    |
| Diabetes                            | 0 (0)                                                    | 4 (50.0)                                            | 155.2 (24.0, ∞)     | <.0001  |
| Hypertension                        | 15 (9.8)                                                 | 4 (50.0)                                            | 9.2 (2.1, 40.6)     | .003    |
| COPD                                | 29 (19.0)                                                | 1 (12.5)                                            | 0.6 (0.07, 5.2)     | .7      |
| Number of chronic conditions        |                                                          |                                                     |                     |         |
| 0                                   | 108 (70.6)                                               | 2 (25.0)                                            | Reference           | ...     |
| 1                                   | 26 (17.0)                                                | 1 (12.5)                                            | 2.1 (0.2, 23.8)     | .6      |
| 2                                   | 14 (9.2)                                                 | 2 (25.0)                                            | 7.7 (1.0, 59.2)     | .05     |
| 3                                   | 5 (3.3)                                                  | 3 (37.5)                                            | 32.4 (4.3, 239.7)   | .0007   |
| <b>Social history</b>               |                                                          |                                                     |                     |         |
| Smoker (male) <sup>b</sup>          |                                                          |                                                     |                     |         |
| Never                               | 65 (47.5)                                                | 0 (0)                                               | Reference           | ...     |
| Former                              | 10 (7.3)                                                 | 2 (33.3)                                            | 14.1 (1.6, ∞)       | .02     |
| Current                             | 62 (45.3)                                                | 3 (50.0)                                            | 3.9 (0.6, ∞)        | .1      |
| Alcohol use (male) <sup>b</sup>     |                                                          |                                                     |                     |         |
| Never                               | 85 (62.0)                                                | 3 (50.0)                                            | Reference           | ...     |
| Former                              | 31 (22.6)                                                | 2 (33.3)                                            | 1.8 (0.3, 11.5)     | .5      |
| Current                             | 21 (15.3)                                                | 1 (16.7)                                            | 1.3 (0.1, 13.6)     | .8      |
| <b>Illness presentation</b>         |                                                          |                                                     |                     |         |
| Anthrax severity category           |                                                          |                                                     |                     |         |
| Mild                                | 124 (81.0)                                               | 0 (0)                                               | Reference           | ...     |
| Moderate                            | 23 (15.0)                                                | 6 (75.0)                                            | 41.7 (7.6, ∞)       | <.0001  |
| Severe                              | 6 (3.9)                                                  | 2 (25.0)                                            | 41.9 (4.8, ∞)       | .003    |
| Fever or chills                     | 52 (34.0)                                                | 7 (87.5)                                            | 13.6 (1.6, 113.4)   | .02     |
| Headache                            | 30 (19.6)                                                | 8 (100)                                             | 43.3 (8.4, ∞)       | <.0001  |
| Severe headache                     | 0 (0)                                                    | 4 (50.0)                                            | 155.2 (24.0, ∞)     | <.0001  |
| Nausea or vomiting                  | 12 (7.8)                                                 | 5 (62.5)                                            | 18.5 (3.2, 134.0)   | .0007   |
| Confusion                           | 0 (0)                                                    | 2 (25.0)                                            | 51.7 (6.0, ∞)       | .002    |
| Malignant pustule edema             | 36 (23.5)                                                | 6 (75.0)                                            | 9.8 (1.9, 50.4)     | .007    |
| Measured fever <sup>c</sup>         | 21 (13.7)                                                | 8 (100)                                             | 65.3 (12.5, ∞)      | <.0001  |
| Heart rate per minute, mean (SD)    | 80.9 (5.5)                                               | 85.1 (8.9)                                          | 1.1 (1.0, 1.3)      | .04     |
| Tachycardia <sup>d</sup>            | 1 (0.7)                                                  | 1 (12.5)                                            | 21.7 (1.2, 384.3)   | .04     |
| Respirations per minute, mean (SD)  | 17.6 (1.6)                                               | 18.6 (2.8)                                          | 1.4 (1.0, 2.0)      | .09     |
| Tachypnea <sup>e</sup>              | 4 (2.6)                                                  | 2 (25.0)                                            | 12.4 (1.9, 81.6)    | .009    |
| Systolic hypertension <sup>f</sup>  | 33 (21.6)                                                | 4 (50.0)                                            | 3.6 (.9, 15.3)      | .08     |
| Diastolic hypertension <sup>f</sup> | 11 (7.2)                                                 | 3 (37.5)                                            | 7.7 (1.6, 36.8)     | .01     |

| Characteristics                                              | Likely<br>Nonmeningitis <sup>a</sup><br>(n=153)<br>n (%) | Likely<br>Meningitis <sup>a</sup><br>(n=8)<br>n (%) | Odds Ratio (95% CI) | P Value |
|--------------------------------------------------------------|----------------------------------------------------------|-----------------------------------------------------|---------------------|---------|
| <b>Laboratory results on admission</b>                       |                                                          |                                                     |                     |         |
| White blood count x10 <sup>9</sup> /L, mean (SD)             | 7.0 (2.1)                                                | 9.0 (3.3)                                           | 1.4 (1.1, 1.9)      | .02     |
| <b>Hemoglobin g/L, mean (SD)</b>                             |                                                          |                                                     |                     |         |
| Male                                                         | 128 (6.1)                                                | 132 (3.9)                                           | 1.1 (1.0, 1.4)      | .1      |
| Female                                                       | 127 (9.1)                                                | 116 (9.9)                                           | 0.9 (.7, 1.1)       | .2      |
| <b>Hematocrit, mean (SD)</b>                                 |                                                          |                                                     |                     |         |
| Male                                                         | 0.44 (0.03)                                              | 0.44 (0.03)                                         | 0 (0, ∞)            | .4      |
| Female                                                       | 0.44 (0.04)                                              | 0.41 (0.02)                                         | 0 (0, ∞)            | .3      |
| Platelets x10 <sup>9</sup> /L, mean (SD)                     | 265 (51)                                                 | 264 (60)                                            | 1.0 (1.0, 1.0)      | .9      |
| Lesion culture positive <sup>g</sup>                         | 70 (48.6)                                                | 4 (50.0)                                            | 1.1 (.3, 4.4)       | .9      |
| Lesion Gram stain positive                                   | 76 (49.7)                                                | 3 (37.5)                                            | 0.9 (.2, 4.4)       | .9      |
| Blood culture positive <sup>g</sup>                          | 6 (4.1)                                                  | 3 (37.5)                                            | 14.0 (2.7, 72.8)    | .002    |
| Positive culture or Gram stain <sup>g</sup>                  | 133 (86.9)                                               | 7 (87.5)                                            | 1.1 (.1, 9.0)       | 1.0     |
| Positive culture, Gram stain, or anthraxin test <sup>g</sup> | 141 (92.2)                                               | 7 (87.5)                                            | 0.6 (.1, 5.2)       | .6      |
| <b>Treatment and Outcome</b>                                 |                                                          |                                                     |                     |         |
| <b>Antimicrobial treatment combinations</b>                  |                                                          |                                                     |                     |         |
| Monotherapy alone                                            | 139 (90.9)                                               | 5 (62.5)                                            | Reference           | ...     |
| Sequential monotherapy                                       | 8 (5.2)                                                  | 0 (0)                                               | 2.7 (0, 16.3)       | .8      |
| Dual therapy alone                                           | 0 (0)                                                    | 1 (12.5)                                            | 23.2 (1.2, ∞)       | .04     |
| Dual therapy followed by monotherapy                         | 6 (3.9)                                                  | 2 (25.0)                                            | 9.0 (.7, 71.6)      | .09     |
| Triple therapy                                               | 0 (0)                                                    | 0 (0)                                               | ...                 | ...     |
| Fatal                                                        | 0 (0)                                                    | 0 (0)                                               | ...                 | ...     |
| Length of hospital stay in days, mean (SD)                   | 17.1 (3.5)                                               | 21.1 (6.4)                                          | 1.2 (1.1, 1.4)      | .008    |

<sup>a</sup> The designations “likely nonmeningitis” and “likely meningitis” were applied based on a clinical algorithm that categorized patients based on signs and symptoms. Patients meeting ≥3 criteria were designated as “likely meningitis” while patients meeting ≤1 were designated “likely nonmeningitis.”

<sup>b</sup> All female patients reported being never smokers and never drinking alcohol except one who reported being a current smoker and one who reported being a former drinker.

<sup>c</sup> Measured fever: recorded temperature at admission >38°C for patients ≥18 years of age or >38.5°C for patients 13-17 years of age.

<sup>d</sup> Tachycardia: recorded heart rate at admission of ≥100 beats per minute for patients ≥18 years of age or >110 beats per minute for patients 13 to 17 years of age.

<sup>e</sup> Tachypnea: recorded respiratory rate at admission of >20 breaths per minute for patients ≥18 years of age or >14 breaths per minute for patients 13 to 17 years of age.

<sup>f</sup> Systolic and diastolic hypertension: recorded blood pressure at admission of systolic ≥130 mmHg and diastolic ≥90 mmHg, respectively.

<sup>g</sup> There were 6 patients with unspecified blood culture results, 7 patients with unspecified lesion culture results, and 1 patient with unspecified Anthraxin results.
